# Supplementary material
Source: MDPI journal article supplement (https://www.mdpi.com/2311-7524/10/4/420)
Supplement: s1 [file s1]

Supplementary table1 Primer sequences for RT-qPCR

| Gene ID            | Forward primer (5'-3') | Reverse primer (5'-3') |
|--------------------|------------------------|------------------------|
| Cluster-13447.0    | AGCTGGTGTGACGGTAATCG   | AAGACTCCACCCCCCAACTCT  |
| Cluster-769.6797   | GAAATGCCTGACAAGGTGCG   | AACCGCTCAGGCAGGTAAAG   |
| Cluster- 769.34168 | TCCCCGACGACAACATCAAG   | CCCATAGCTCTTCAGCTCGG   |
| Cluster-769.37917  | GGGAACCTAAGGTGACGGTG   | TCGCCTTCTCATCTCCTCCA   |
| Cluster-769.46875  | TTGCTGTGACAAAGCCAACG   | CCTATCTTCTGGGGCAAGGC   |
| Cluster-769.56890  | GGACATGAGCTTCAGTGCCT   | GATCTCCATTGCCACCGCTA   |
| Cluster-769.48503  | ACCATAGCCGTTTGGTCCAG   | GTGGGGCCAAACTGTGTTTC   |
| Cluster-769.2256   | GCGAAGGCATCGAATTGGTC   | GGCGGTGGGTTTTGTTTACC   |
| CnGAPDH            | GGGAATCCTTGGTTACACTGAG | ACCCCATTCGTTGTCATACC   |

Supplementary table 2 Transcriptome analysis of *C. nitidissima* stamens in three stages

| sample | raw reads | clean reads | error rate | Q20   | Q30   | GC_pct |
|--------|-----------|-------------|------------|-------|-------|--------|
| S0     | 22534958  | 21624002    | 0.03       | 96.54 | 90.98 | 44.62  |
| S1     | 23788150  | 23129446    | 0.03       | 96.26 | 90.40 | 44.11  |
| S2     | 22366701  | 21563033    | 0.03       | 96.71 | 91.41 | 44.85  |

Supplementary table 3 Summary for the transcriptome assembly of *C. nitidissima* stamens

| Type        | Mean length | Median length | Max length | N50  | N90 | Total  |
|-------------|-------------|---------------|------------|------|-----|--------|
| transcripts | 1297        | 941           | 11340      | 1879 | 586 | 205172 |
| unigenes    | 1124        | 702           | 11340      | 1752 | 468 | 78997  |

Supplementary table 4 Unigenes annotation

| Database                           | Number of Unigenes | Percentage |
|------------------------------------|--------------------|------------|
| Total Unigenes                     | 78997              | 100        |
| Annotated in SwissProt             | 26284              | 33.27      |
| Annotated in PFAM                  | 27307              | 34.56      |
| Annotated in NT                    | 52766              | 66.79      |
| Annotated in NR                    | 40252              | 50.95      |
| Annotated in KOG                   | 6600               | 8.35       |
| Annotated in KO                    | 12135              | 15.36      |
| Annotated in GO                    | 27304              | 34.56      |
| Annotated in at least one Database | 58120              | 73.57      |
| Annotated in all Databases         | 3952               | 5          |

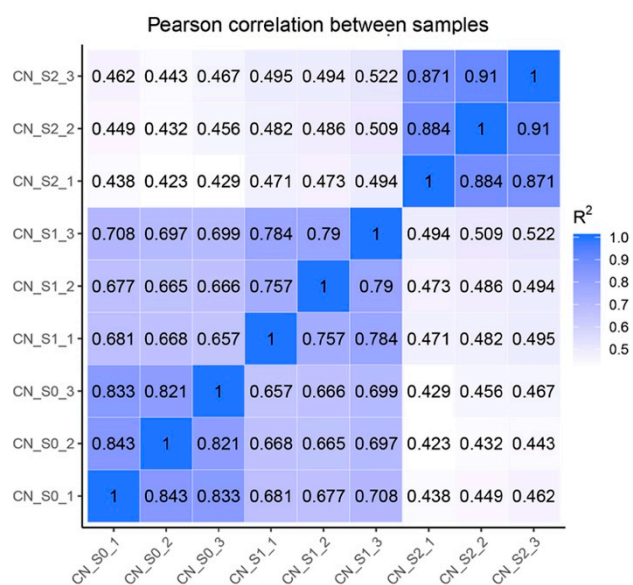

Supplementary Fig. 1 Clustering heat map of samples.

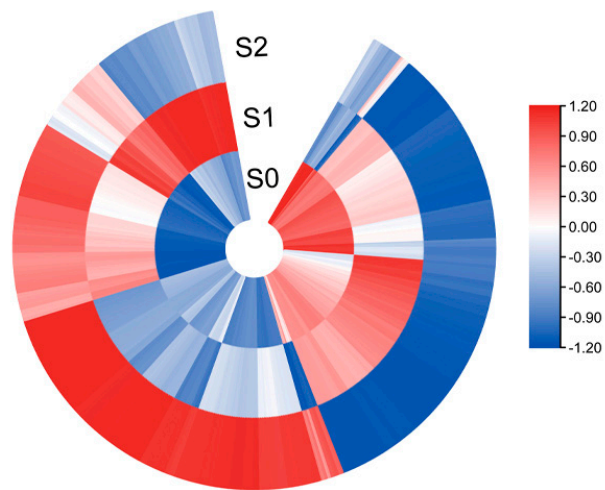

Supplementary Fig. 2 A heat map showing DEGs enriched in “oxidoreductase activity” during the S0–S2 stages.
